# Inhibition of HIV-1 Infection in *Ex Vivo* Cervical Tissue Model of Human Vagina by Palmitic Acid; Implications for a Microbicide Development

Xudong Lin<sup>1‡a</sup>, Elena E. Paskaleva<sup>1,3‡b</sup>, William Chang<sup>1</sup>, Alexander Shekhtman<sup>2,3</sup>, Mario Canki<sup>1,3\*</sup>

**1** Center for Immunology and Microbial Disease, Albany Medical College, Albany, New York, United States of America, **2** Department of Chemistry, State University of New York at Albany, Albany, New York, United States of America, **3** Palm Biologicals, LLC, Albany, New York, United States of America

## Abstract

**Background:** Approximately 80% of all new HIV-1 infections are acquired through sexual contact. Currently, there is no clinically approved microbicide, indicating a clear and urgent therapeutic need. We recently reported that palmitic acid (PA) is a novel and specific inhibitor of HIV-1 fusion and entry. Mechanistically, PA inhibits HIV-1 infection by binding to a novel pocket on the CD4 receptor and blocks efficient gp120-to-CD4 attachment. Here, we wanted to assess the ability of PA to inhibit HIV-1 infection in cervical tissue *ex vivo* model of human vagina, and determine its effect on *Lactobacillus* (L) species of probiotic vaginal flora.

**Principal Findings:** Our results show that treatment with 100–200  $\mu$ M PA inhibited HIV-1 infection in cervical tissue by up to 50%, and this treatment was not toxic to the tissue or to *L. crispatus* and *jensenii* species of vaginal flora. *In vitro*, in a cell free system that is independent of *in vivo* cell associated CD4 receptor; we determined inhibition constant (Ki) to be  $\sim$ 2.53  $\mu$ M.

**Significance:** These results demonstrate utility of PA as a model molecule for further preclinical development of a safe and potent HIV-1 entry microbicide inhibitor.

**Citation:** Lin X, Paskaleva EE, Chang W, Shekhtman A, Canki M (2011) Inhibition of HIV-1 Infection in *Ex Vivo* Cervical Tissue Model of Human Vagina by Palmitic Acid; Implications for a Microbicide Development. PLoS ONE 6(9): e24803. doi:10.1371/journal.pone.0024803

**Editor:** Landon Myer, University of Cape Town, South Africa

**Received:** April 11, 2011; **Accepted:** August 22, 2011; **Published:** September 19, 2011

**Copyright:** © 2011 Lin et al. This is an open-access article distributed under the terms of the Creative Commons Attribution License, which permits unrestricted use, distribution, and reproduction in any medium, provided the original author and source are credited.

**Funding:** This work was supported by National Institutes of Health grant number AT003371 to MC and GM085006 to AS. The funders had no role in study design, data collection and analysis, decision to publish, or preparation of the manuscript.

**Competing Interests:** The authors have declared that no competing interests exist.

\* E-mail: cankim@mail.amc.edu

‡a Current address: J. Craig Venter Institute, Rockville, Maryland, United States of America

‡b Current address: for Biotechnology and Interdisciplinary Studies, Rensselaer Polytechnic Institute, Troy, New York, United States of America

## Introduction

Worldwide, sexual transmission remains the principal route of HIV transmission accounting for approximately 80% of all new infections, and women bear a disproportionate burden of people living with HIV (UNAIDS, 2010) [1]. In the absence of an effective vaccine, there is an urgent need to supplement currently available strategies with novel therapeutics including microbicides that are aimed at preventing sexual transmission of HIV. Viral entry inhibitors are ideally suited for use in microbicide formulations [2], however currently there are no clinically approved microbicide or trials that specifically include CD4 inhibitors of virus entry into the host (for a full list see www.avac.org).

In our search for novel inhibitors of HIV-1, we investigated a large number of natural products, and from *Sargassum fusiforme* we isolated and identified palmitic acid (PA) as a natural small molecule that blocked virus entry [3,4,5]. We reported that palmitic acid is a specific CD4 fusion inhibitor of both X4 and R5 HIV-1 entry, which also efficiently inhibited virus-to-cell and cell-to-cell fusion, and it did not internalize CD4 receptor or perturb lipid rafts [6]. PA bound to the CD4 receptor specifically, with

dissociation constant ( $K_d$ ) of  $\sim$ 1.5  $\mu$ M, and this binding was *via* PA's hydrophobic methyl and methylene groups located away from the carboxyl end, which functions by blocking efficient gp120-to-CD4 attachment and fusion [6,7]. We also showed that PA occupies a novel hydrophobic cavity on the CD4 receptor that is constrained by amino acids Phe52-to-Leu70 [7], which encompass residues that have been previously identified as a region critical for gp120 binding [8,9].

In the present report we wanted to ascertain PA's utility for microbicide development by testing its ability to block HIV-1 infection in *ex vivo* model of vaginal mucosa, its effect on *Lactobacillus* species present in normal vaginal flora, and PA's *in vitro* inhibition constant independent of variable *in vivo* CD4 expression.

## Results

Based on our previous results demonstrating that PA is a specific HIV-1 entry inhibitor and a potential lead molecule for further development [6,7], we wanted to examine the practical utility of PA to inhibit HIV-1 infection in a human cervical tissue *ex vivo* model of vaginal mucosa. This model closely resembles the vaginal

epithelial layer that mimics *in vivo* conditions for HIV sexual transmission and infection [10,11,12], and it has been established for evaluating potential microbicide candidates [13,14,15]. Light microscopy examination of the uninfected and paraffin embedded sections from 3 mm<sup>3</sup> biopsy punches of the cervix revealed that the tissue architecture was preserved (Fig. 1A). Although both X4 and R5 viruses are sexually transmitted, R5 viruses predominate early in infection and may be more easily transmissible than X4 viruses [12,14]. Tissue was treated with 0, 100 or 200  $\mu$ M PA, and then tested for inhibition of productive HIV-1 R5-tropic BaL infection by p24 ELISA (Fig. 1B). Measurements of HIV-1 p24 antigen levels in PA untreated cell-free tissue culture supernatants (0  $\mu$ M) revealed a peak of p24 production on day 7 that measured 1421 pg p24/ml. This represented an increase from 943 pg p24/ml on day 4, which was followed by a gradual decline on day 10, to 785 pg p24/ml. Increasing p24 values indicated productive and ongoing HIV-1 infection, and *de novo* viral synthesis. In contrast, treatment with 100  $\mu$ M PA, significantly reduced HIV-1 replication to 604, 960, and 452 pg p24/ml on days 4, 7, and 10, respectively ( $p=0.04$ , repeated measures ANOVA). Compared to PA untreated tissue, this reduction in HIV-1 replication corresponded to a calculated 36, 32, and 42% inhibition of HIV-1 infection. Similar results were obtained for treatment with 200  $\mu$ M PA, which also significantly reduced HIV-1 infection by 38, 48, and 43% on day 4, 7, and 10, respectively. However, there appeared to be no significant difference between 100 and 200  $\mu$ M PA treatment. Tissue toxicity was measured on day 10 after infection, by MTT viability assay, which demonstrated an absence of toxicity ( $p=0.64$ , one-way ANOVA) (Fig. 1C). Tissue infection with X4 HIV-1 was less productive, however inhibition by PA was similar to that of R5 infection (not shown).

*In vivo*, normal vaginal flora consists predominantly of common probiotic *Lactobacillus* bacterial species [16] that a successful topical microbicide should not be toxic to, as was outlined in

screening algorithm for testing of preclinical topical microbicides [17]. To determine potential compound toxicity, we tested PA treatment on common *L. crispatus* and *jensenii* species normally present in vaginal tract (Fig. 2 A and B). Increasing concentrations of PA were incubated for 24 hours in presence of either *L. crispatus* (Fig. 2A) or *jensenii* (Fig. 2B), and % viability was calculated from 0  $\mu$ M PA (no treatment) that was taken as 100% viability. *L. crispatus* showed viability over 96% with PA concentrations of up to 50  $\mu$ M, which decreased to 78.5% with 500  $\mu$ M PA treatment. *L. jensenii* remained viable over 94% with up to the highest treatment of 500  $\mu$ M PA. Vehicle control (VC) was also not toxic to either species that remained viable over 95%. Based on these results we conclude that PA may be considered suitable for further topical microbicide evaluation and development.

Peripheral blood lymphocytes (PBL) and macrophages (M $\phi$ 's) are primary targets for *in vivo* HIV-1 infection and replication in systemic circulation as well as in vaginal submucosa, and previously we demonstrated ability of PA treatment to inhibit ongoing virus replication in these physiologically relevant cells [6]. However, PA inhibited HIV replication in PBL with approximately 10-fold greater efficacy as compared to inhibition in M $\phi$ 's [6]. Because CD4 cell surface HIV receptor expression varies between different cell types, here we wanted to ascertain PA's inhibition efficacy that is independent of *in vivo* cell surface expression. We utilized *in vitro* gp120-to-CD4 capture ELISA to determine PA's inhibition constant ( $K_i$ ) (Figure 3). Envelope gp120 (IIIB) protein was captured on 96 well plates, washed, and incubated in the presence of CD4-biotin alone or in the presence of serial dilutions of PA as indicated. Percent CD4 binding was calculated from gp120-CD4 complex formation in the absence of any inhibitor. Inhibition constant,  $K_i$ , was calculated by using the equation  $K_i = IC_{50}/(1+[CD4]/K_d)$  [18], based on  $IC_{50}$  concentration of bound CD4,  $[CD4] = 50$  nM, and CD4 binding affinity

### A) Ectocervix

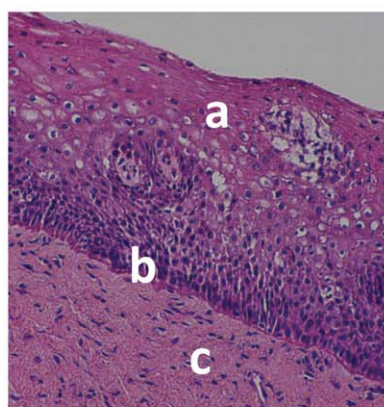

### B) HIV-1 replication

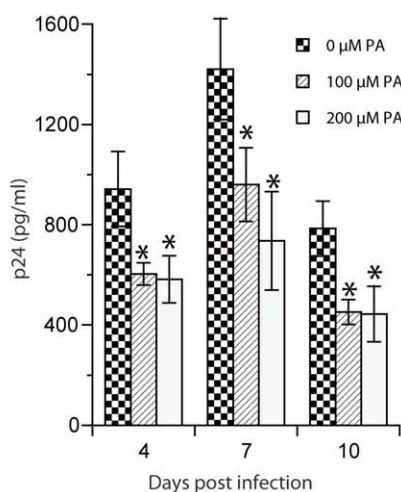

### C) Viability

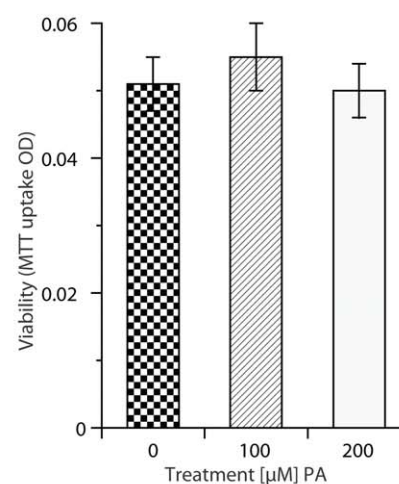

**Figure 1. Inhibition of HIV-1 infection in human cervix model of vaginal mucosa.** 3 mm<sup>3</sup> biopsy punches of the ectocervix tissue samples from premenopausal women with conditions not involving the cervix were processed within 1–3 hours after surgery and directly cultured in 48 well plates in 300  $\mu$ l/well DMEM/F12 media. (A) Paraffin embedded, and hematoxylin and eosin (H&E) stained sections of the uninfected ectocervix tissue were identified to be composed of (a) stratified squamous epithelial cell layer, (b) basal epithelial layer, and (c) submucosa, which was visualized on an Olympus BX41 Altra 20 Soft Image System, 100 $\times$  magnification. (B) Replicates ( $n=6$ ) of tissue were treated for 24 h with 0, 100, or 200  $\mu$ M PA, and then infected with  $2 \times 10^5$  p24/ml cell-free HIV-1 BaL in 300  $\mu$ l for 16 h. Tissues was washed 3 times to remove the virus, and returned to culture with each respective treatment for the duration of the experiment. At the indicated time points, HIV-1 replication was tested by p24 ELISA, and repeated measures ANOVA was used to calculate statistical significance (\*) between groups. (C) At day 10 after infection, tissue was collected and viability determined by the MTT assay. Representative of three experiments, all data are mean  $\pm$  SD. doi:10.1371/journal.pone.0024803.g001

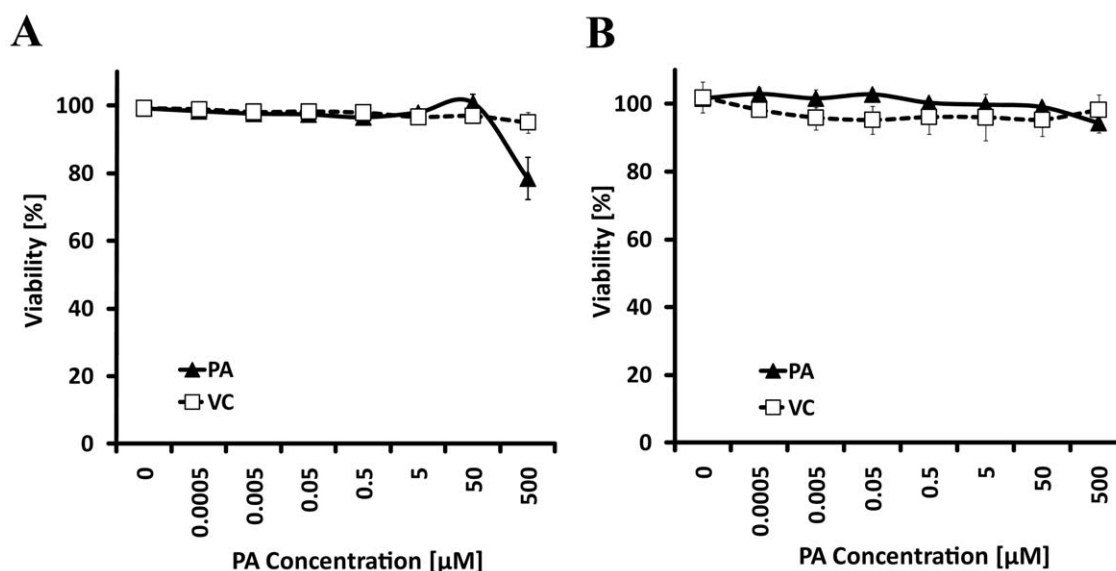

**Figure 2. *Lactobacillus* toxicity assay.** *L. crispatus* (A) and *jensenii* (B) species were tested for toxicity against increasing concentrations of PA that was diluted in vehicle control (VC), 0.5% DMSO highest concentration. Dilutions of PA or VC were plated in triplicate on 96-well plates in 100 μl volume, and bacterial species grown in MRS medium were diluted and added to a final volume of 200 μl. After 24 hours incubation, bacterial cultures were read in a spectrophotometer at OD<sub>490</sub> and % viability was calculated from untreated cultures (0 μg PA) that was taken as 100% viability. Bars indicate ± SD of three separate experiments.  
doi:10.1371/journal.pone.0024803.g002

for gp120,  $K_d = 5$  nM, which is consistent with and validated our *in vitro*  $K_d$  value of 1.5 μM for CD4 binding [6].

## Discussion

In this *ex vivo* model of female genital mucosa that simulates damaged epithelium and allows for maximal virus infection and replication [19], our data clearly demonstrate that the 100–200 μM PA treatment inhibits productive R5 HIV-1 infection by up to 48%, and that the PA treatment is not toxic to tissue or to probiotic *Lactobacillus* species tested here. Considering that PA was not formulated into a topical delivery vehicle may have imposed suboptimal tissue penetration and HIV inhibition in the underlying submucosa containing PBL and Mφ cells. Previously we demonstrated ability of PA treatment to inhibit ongoing virus replication in these physiologically relevant cells, however, inhibition was more efficient in PBL as compared to Mφ's [6]. The reason for differences in inhibition between tissue, PBL and Mφ's is not clear, however it may indicate variable CD4 receptor cell surface expression, and intrinsically different number of primary cells in each tissue biopsy. This proposition is logical considering that PA has to bind directly to the CD4 receptor to inhibit HIV-1 entry, and therefore quantitatively different CD4 expression will affect PA's inhibition efficacy. To avoid this degree of difference of *in vivo* primary cell number and CD4 expression, we tested *in vitro* PA's inhibition efficacy ( $K_i$ ) to block gp120-to-CD4 attachment (Figure 3). The measured  $K_i$  was ~2.53 μM, which is in close agreement with previously published CD4 dissociation constant of ~1.5 μM [6].

Although there are several candidate microbicides in clinical trials [20], PA is a novel class of small molecules with bi-functional mode of action that specifically targets and binds to the CD4 receptor *via* its hydrocarbon chain, and blocks efficient gp120-to-CD4 fusion *via* its carboxyl end [6,7]. Targeting the human CD4 receptor as opposed to viral envelope or other viral proteins, offers the advantage of removing selective pressure on the virus to quickly mutate and bypass the imposed restriction.

## Inhibition of gp120-CD4 complex formation

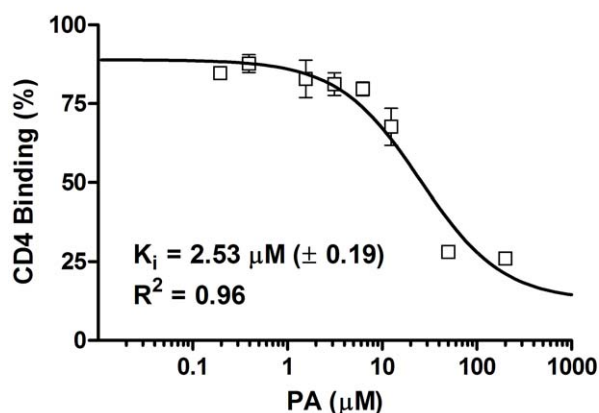

**Figure 3. PA inhibition constant for gp120-to-CD4 complex formation.** Inhibition of gp120-CD4 complex formation was investigated by gp120 capture ELISA. Envelope gp120 (IIIB) protein was captured on 96 well flat bottom plates, washed, and incubated in the presence of CD4-biotin alone or in the presence of increasing concentrations of PA, as indicated. Streptavidin-HRP was added, and then developed by addition of o-Phenylenediamine dihydrochloride (OPD) substrate. Colorimetric reaction was stopped by adding 1 N HCl, and read at 490 nm. % CD4 binding was calculated from gp120-CD4 complex formation in the absence of PA inhibitor, and inhibition constant,  $K_i$ , was calculated utilizing previously published equation [18]. Representative of three experiments, all data are mean ± SD.  
doi:10.1371/journal.pone.0024803.g003

Current results from The Center for the AIDS Program of Research in South Africa (CAPRISA) clinical trial have demonstrated that micobicide application of reverse transcriptase (RT) tenofovir gel, prevented HIV infection by up to 39% overall, and by 54% in women with high gel adherence [21]. Considering that nucleotide RT inhibitor prevents provirus transcription and not virus entry, we postulate that combination with an entry inhibitor such as PA may eliminate HIV infection with more robust efficacy. The idea of combining therapeutics that target different stages of virus life cycle is logical as it has been effectively demonstrated with HAART therapy in AIDS patients.

PA's toxicology screening, breadth of primary HIV inhibition, and gel formulations are currently under investigation.

## Materials and Methods

Palmitic acid (Sigma) was solubilized at 100 mM in ethanol (EtOH) [22] and stored at  $-20^{\circ}\text{C}$ . Working aliquots were kept at  $4^{\circ}\text{C}$  for up to 4 weeks.

Written informed consent approved protocol by Albany Medical College (AMC) Institutional Review Board (IRB) was obtained from all participants involved in the study, which was performed at the AMC, Albany New York. 3 mm<sup>3</sup> biopsy punches of the ectocervix tissue samples were obtained from premenopausal women with conditions not involving the cervix, and were processed within 1–3 hours after surgery. Tissue was cultured in a nonpolarized manner as previously described [10,19], in 48 well plates in 300  $\mu\text{l}$ /well DMEM/F12 media (Invitrogen) supplemented with 10% FBS for the duration of the experiment. Tissue was treated with increasing concentrations of PA or  $10^{-6}$  M ddC, and infected with HIV-1 R5 BaL at 0.3 multiplicity of infection (MOI).

*Lactobacillus crispatus* and *jensenii* species were purchased from American Type Culture Collection (ATCC), number 33820 and 25258, respectively. Bacterial toxicity assay was performed under facultative anaerobic conditions as previously described [17]. Briefly, bacterial species were grown in MRS medium and plated on 96 well plates containing increasing concentrations of PA.

## References

- Klasse PJ, Shattock R, Moore JP (2008) Antiretroviral drug-based microbicides to prevent HIV-1 sexual transmission. *Annu Rev Med* 59: 455–471.
- Ramjee G, Doncel GF, Mehendale S, Tolley EE, Dickson K (2008) Microbicides 2008 conference: From discovery to advocacy. *AIDS Res Ther* 5: 19.
- Canki M, Lee D (2007) Methods and compositions for the use of Sargassum fusiforme for the inhibition of HIV-1 infection. USA.
- Paskaleva EE, Lin X, Duus K, McSharry JJ, Veille JC, et al. (2008) Sargassum fusiforme fraction is a potent and specific inhibitor of HIV-1 fusion and reverse transcriptase. *Virol J* 5: 8.
- Paskaleva EE, Lin X, Li W, Cotter R, Klein MT, et al. (2006) Inhibition of highly productive HIV-1 infection in T cells, primary human macrophages, microglia, and astrocytes by Sargassum fusiforme. *AIDS Res Ther* 3: 15.
- Lee DY, Lin X, Paskaleva EE, Liu Y, Puttamadappa SS, et al. (2009) Palmitic Acid Is a Novel CD4 Fusion Inhibitor That Blocks HIV Entry and Infection. *AIDS Res Hum Retroviruses* 12: 1231–1241.
- Paskaleva EE, Xue J, Lee DY, Shekhtman A, Canki M (2010) Palmitic Acid Analogs Exhibit Nanomolar Binding Affinity for the HIV-1 CD4 Receptor and Nanomolar Inhibition of gp120-to-CD4 Fusion. *PLoS One* 5.
- Arthos J, Deen KC, Chaikin MA, Formwald JA, Sathe G, et al. (1989) Identification of the residues in human CD4 critical for the binding of HIV. *Cell* 57: 469–481.
- Kwong PD, Wyatt R, Robinson J, Sweet RW, Sodroski J, et al. (1998) Structure of an HIV gp120 envelope glycoprotein in complex with the CD4 receptor and a neutralizing human antibody. *Nature* 393: 648–659.
- Greenhead P, Hayes P, Watts PS, Laing KG, Griffin GE, et al. (2000) Parameters of human immunodeficiency virus infection of human cervical tissue and inhibition by vaginal virucides. *J Virol* 74: 5577–5586.
- Collins KB, Patterson BK, Naus GJ, Landers DV, Gupta P (2000) Development of an in vitro organ culture model to study transmission of HIV-1 in the female genital tract. *Nat Med* 6: 475–479.
- Shattock RJ, Moore JP (2003) Inhibiting sexual transmission of HIV-1 infection. *Nat Rev Microbiol* 1: 25–34.
- Fletcher PS, Wallace GS, Mesquita PM, Shattock RJ (2006) Candidate polyanion microbicides inhibit HIV-1 infection and dissemination pathways in human cervical explants. *Retrovirology* 3: 46.
- Ramjee G, Shattock R, Delany S, McGowan I, Morar N, et al. (2006) Microbicides 2006 conference. *AIDS Res Ther* 3: 25.
- Rohan LC, Moncla BJ, Kunjara Na Ayudhya RP, Cost M, Huang Y, et al. (2010) In vitro and ex vivo testing of tenofovir shows it is effective as an HIV-1 microbicide. *PLoS One* 5: e9310.
- Hillier SL (1998) The vaginal microbial ecosystem and resistance to HIV. *AIDS Res Hum Retroviruses* 14 Suppl 1: S17–21.
- Lackman-Smith C, Osterling C, Luckenbaugh K, Mankowski M, Snyder B, et al. (2008) Development of a comprehensive human immunodeficiency virus type 1 screening algorithm for discovery and preclinical testing of topical microbicides. *Antimicrob Agents Chemother* 52: 1768–1781.
- Cheng Y, Prusoff WH (1973) Relationship between the inhibition constant ( $K_i$ ) and the concentration of inhibitor which causes 50 per cent inhibition ( $I_{50}$ ) of an enzymatic reaction. *Biochem Pharmacol* 22: 3099–3108.
- Maher D, Wu X, Schacker T, Horbul J, Southern P (2005) HIV binding, penetration, and primary infection in human cervicovaginal tissue. *Proc Natl Acad Sci U S A* 102: 11504–11509.
- Buckheit RW, Jr., Watson KM, Morrow KM, Ham AS (2010) Development of topical microbicides to prevent the sexual transmission of HIV. *Antiviral Res* 85: 142–158.
- Abdool Karim Q, Abdool Karim SS, Frohlich JA, Grobler AC, Baxter C, et al. (2011) Effectiveness and safety of tenofovir gel, an antiretroviral microbicide, for the prevention of HIV infection in women. *Science* 329: 1168–1174.
- Wolfe RA, Sato GH, McClure DB (1980) Continuous culture of rat C6 glioma in serum-free medium. *J Cell Biol* 87: 434–441.

## Acknowledgments

The authors wish to thank Dr. Simon Hirschl for help with cervical tissue preparation, histology, and valuable discussions.

## Author Contributions

Conceived and designed the experiments: MC AS EEP. Performed the experiments: XL EEP WC AS. Analyzed the data: XL EEP AS MC. Wrote the paper: MC.

23. Adachi A, Gendelman HE, koening S, Folks T, Willey R, et al. (1986) Production of acquired immunodeficiency syndrome-associated retrovirus in human and nonhuman cells transfected with an infectious molecular clone. *Journal of Virology* 59: 284–291.
24. Toohey K, Wehrly K, Nishio J, Perryman S, Chesebro B (1995) Human immunodeficiency virus envelope V1 and V2 regions influence replication efficiency in macrophages by affecting virus spread. *Virology* 213: 70–79.
